# Supplementary material for: Selection of Soybean and Cowpea Cultivars with Superior Performance under Drought Using Growth and Biochemical Aspects
Source: MDPI journal article supplement (doi:10.3390/plants12173134), 2023-08-31
Supplement: s1 [file s1]

## Article

# Selection of soybean and cowpea cultivars with superior performance under drought using growth and biochemical aspects

Rafael de Souza Miranda <sup>1,2,\*</sup>, Bruno Sousa Figueiredo da Fonseca <sup>3</sup>, Davielson Silva Pinho <sup>3</sup>, Jennyfer Yara Nunes Batista <sup>3</sup>, Ramilos Rodrigues de Brito <sup>2</sup>, Everaldo Moreira da Silva <sup>3</sup>, Wesley Santos Ferreira <sup>3</sup>, José Hélio Costa <sup>4</sup>, Marcos dos Santos Lopes <sup>3</sup>, Renan Henrique Beserra de Sousa <sup>2</sup>, Larissa Fonseca Neves <sup>3</sup>, José Antônio Freitas Penha <sup>3</sup>, Amanda Soares Santos <sup>2</sup>, Juliana Joice Pereira Lima <sup>3</sup>, Stelamaris de Oliveira Paula-Marinho <sup>2</sup>, Francisco de Alcântara Neto <sup>1</sup>, Évelyn Silva de Aguiar <sup>5</sup>, Clesivan Pereira dos Santos <sup>5</sup> and Enéas Gomes-Filho <sup>4</sup>

<sup>1</sup> Plant Science Department, Federal University of Piauí, Teresina, Piauí, Brazil; [fneto@ufpi.edu.br](mailto:fneto@ufpi.edu.br)

<sup>2</sup> Postgraduate Program in Agricultural Sciences, Campus Professora Cinobelina Elvas, Federal University of Piauí, Bom Jesus, 64900-000, Piauí, Brazil; [ramilos@hotmail.com](mailto:ramilos@hotmail.com), [renanbiologiabomjesus@gmail.com](mailto:renanbiologiabomjesus@gmail.com), [amandasantosagro@gmail.com](mailto:amandasantosagro@gmail.com), [stelamarisop@live.com](mailto:stelamarisop@live.com)

<sup>3</sup> Agronomic Engineering Course, Campus Professora Cinobelina Elvas, Federal University of Piauí, Bom Jesus, 64900-000, Piauí, Brazil; [brunofigueiredo91@ufpi.edu.br](mailto:brunofigueiredo91@ufpi.edu.br), [davielson5@gmail.com](mailto:davielson5@gmail.com), [jennyferyaranb@gmail.com](mailto:jennyferyaranb@gmail.com), [everaldo@ufpi.edu.br](mailto:everaldo@ufpi.edu.br), [wsferreira18@hotmail.com](mailto:wsferreira18@hotmail.com), [marcossantos319@gmail.com](mailto:marcossantos319@gmail.com), [larissafonseca034@gmail.com](mailto:larissafonseca034@gmail.com), [joseafpenha@outlook.com](mailto:joseafpenha@outlook.com), [julianalima@ufpi.edu.br](mailto:julianalima@ufpi.edu.br)

<sup>4</sup> Department of Biochemistry and Molecular Biology, Federal University of Ceará, Fortaleza 60451-970, Ceará, Brazil; [helio.costa@ufc.br](mailto:helio.costa@ufc.br), [egomesf@ufc.br](mailto:egomesf@ufc.br)

<sup>5</sup> Postgraduate Program in Environmental Sciences, Center of Sciences of Chapadinha, Federal University of Maranhão, Boa Vista, 65500-000, Chapadinha, Maranhão, Brazil; [evellynas@outlook.com](mailto:evellynas@outlook.com), [clesivan.pereira@ufma.br](mailto:clesivan.pereira@ufma.br)

\* Correspondence: [rsmiranda@ufpi.edu.br](mailto:rsmiranda@ufpi.edu.br)

## Supplementary material

**Table S1.** Soybeans cultivars grown in agricultural areas of the Brazilian Cerrado.

| Soybean Cultivars | Number in NRC <sup>(1)</sup> | Beginning of protection | Relative Maturity Group | Type of growth  |
|-------------------|------------------------------|-------------------------|-------------------------|-----------------|
| AS3810 IPRO       | 20170297                     | June 01st, 2017         | 8.1                     | Determined      |
| M8644 IPRO        | 20150187                     | March 16th, 2015        | 8.6                     | Determined      |
| TMG1180 RR        | 20160073                     | October 06th, 2015      | 8.0                     | Semi-determined |
| NS8338 IPRO       | 20170297                     | June 01st, 2017         | 8.3                     | Determined      |
| BMX81I81 IPRO     | WR <sup>(2)</sup>            | -                       | 8.1                     | Indetermined    |
| M8808 IPRO        | 20160171                     | March 11th, 2016        | 8.8                     | Determined      |
| BÔNUS8579 IPRO    | WR                           | -                       | 7.9                     | Indetermined    |

Note - <sup>(1)</sup> National Registry of Cultivars of the Ministry of Agriculture, Livestock, and Supply. <sup>(2)</sup>WR - Without registration.

**Table S2.** Cowpea cultivars grown in agricultural areas of the Brazilian semiarid region.

| Cowpea Cultivars       | Number in NRC <sup>(1)</sup> | Registration date <sup>(2)</sup> | Coordinating institution of release | Breeding method                           | Commercial subclass |
|------------------------|------------------------------|----------------------------------|-------------------------------------|-------------------------------------------|---------------------|
| Aracê                  | 25892                        | August 26th, 2009                | Embrapa Meio-Norte                  | Genealogical                              | Green               |
| Novaera                | 22156                        | September 10th, 2007             | Embrapa Meio-Norte                  | Genealogical                              | White               |
| Pajeú                  | 22995                        | April 11th, 2008                 | Embrapa Meio-Norte                  | Single-pod descent                        | Mulatto             |
| Pitiúba <sup>(2)</sup> | 5177                         | June 19th, 2000                  | UFC                                 | Mass selection                            | Mulatto             |
| Tumucumaque            | 22891                        | March 6th, 2008                  | Embrapa Meio-Norte                  | Single-pod descent                        | White               |
| TVU                    | WR <sup>(3)</sup>            | -                                | EMAPA <sup>(4)</sup>                | Introduction and selection among accesses | Mulatto             |
| Xique-xique            | 22997                        | April 11th, 2008                 | Embrapa Meio-Norte                  | Single-pod descent                        | White               |

Note - <sup>(1)</sup> National Registry of Cultivars of the Ministry of Agriculture, Livestock, and Supply. <sup>(2)</sup> Registered in the Access Registry Book of the Cowpea Germplasm Bank at the Federal University of Ceará in 1965 (BOOK1963). <sup>(3)</sup> Without registration. <sup>(4)</sup> EMAPA = Empresa Maranhense de Pesquisa Agropecuária. Source: Freire Filho, F.R. Feijão-caupi no Brasil: Produção, melhoramento genético, avanços e desafios. Teresina-PI: Embrapa Meio-Norte, 2011, 84p.
